# Supplementary material for: Identifying Antibacterial Compounds in Black Walnuts (Juglans nigra) Using a Metabolomics Approach
Source: PubMed Central journal article supplement (PMC6316014; doi:10.3390/metabo8040058), 2018-09-29
Supplement: metabolites-08-00058-s001.pdf [file metabolites-08-00058-s001.pdf]

## Supplementary Information

Article

# Identifying Antibacterial Compounds in Black Walnuts (*Juglans nigra*) Using A Metabolomics Approach

Khanh-Van Ho <sup>1,2</sup>, Zhentian Lei <sup>3</sup>, Lloyd Sumner <sup>3</sup>, Mark V. Coggeshall <sup>4</sup>, Hsin-Yeh Hsieh <sup>5</sup>, George C. Stewart <sup>5</sup>, Chung-Ho Lin <sup>1,\*</sup>

<sup>1</sup> The Center for Agroforestry, School of Natural Resources, University of Missouri, Columbia, MO, USA

<sup>2</sup> Department of Food Technology, Can Tho University, Can Tho, Vietnam

<sup>3</sup> Metabolomics Center, University of Missouri, Columbia, MO, USA

<sup>4</sup> U. S. Northern Research Station, USDA-Forest Service, West Lafayette, IN, USA

<sup>5</sup> Department of Veterinary Pathobiology, MU Bond Life Sciences Center, Columbia, MO, USA

\* Corresponding author: linchu@missouri.edu

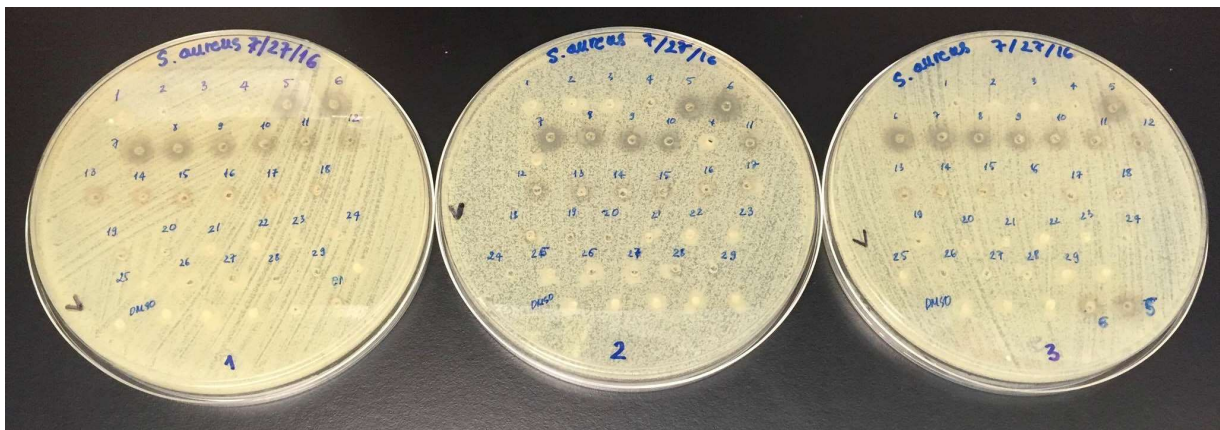

**Supplementary Figure 1.** Zone of inhibition of 29 Mystry fractions (out of 46) from column chromatography. 1-29: fraction 1 through fraction 29.

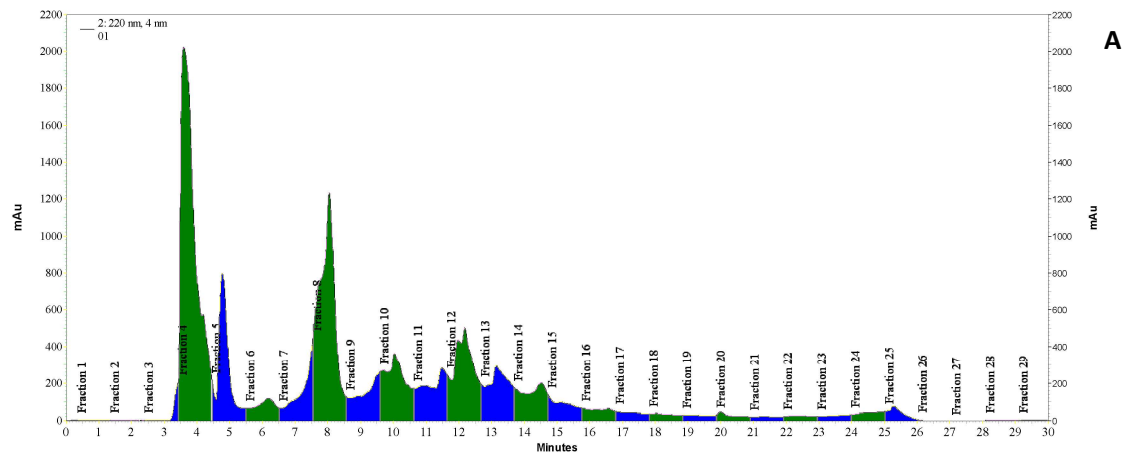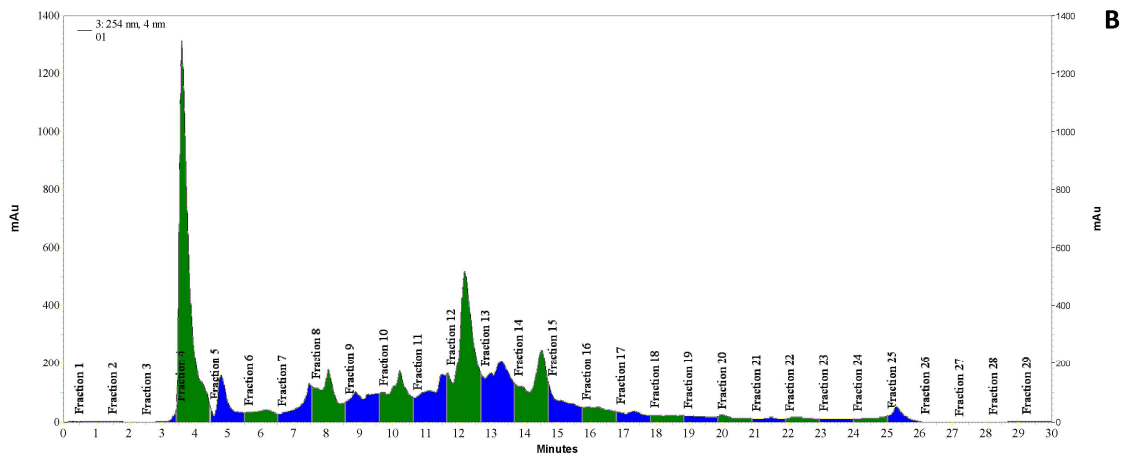

**Supplementary Figure 2.** Shimadzu UV Chromatogram of HPLC sub-fraction F14 at 220 nm (A) and 254 nm (B) generated from SPD-10Avp photodiode array detector.

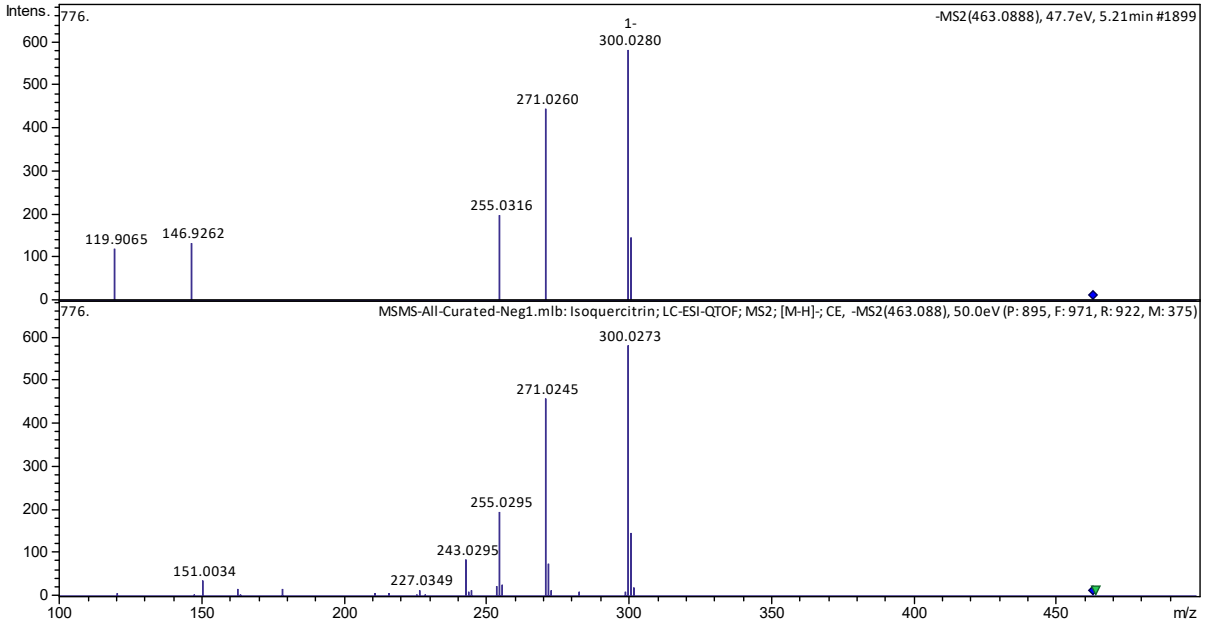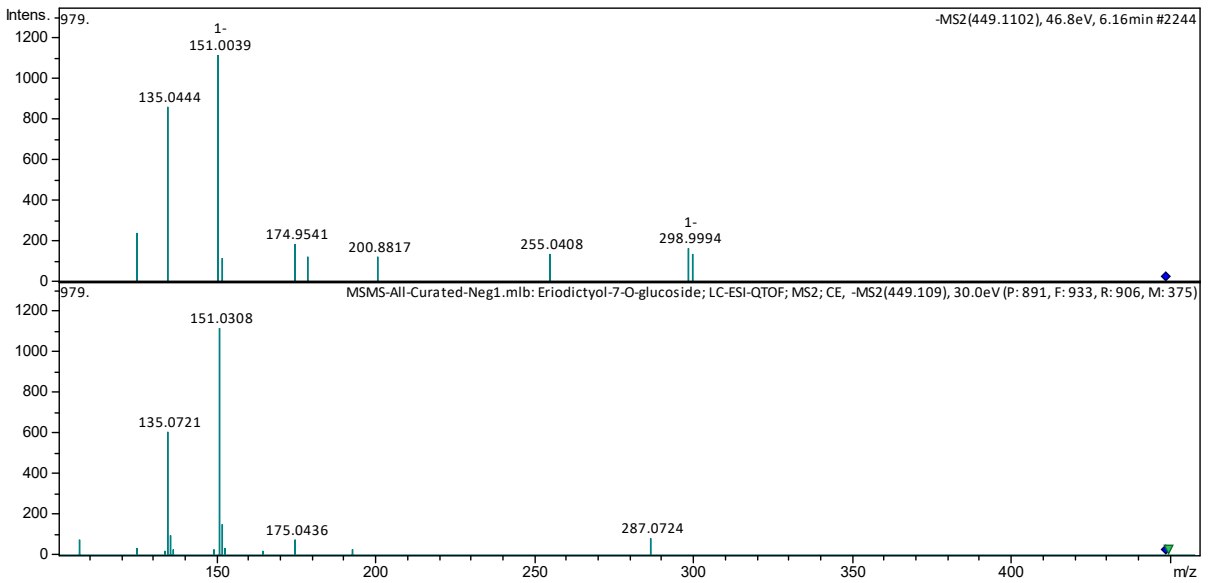

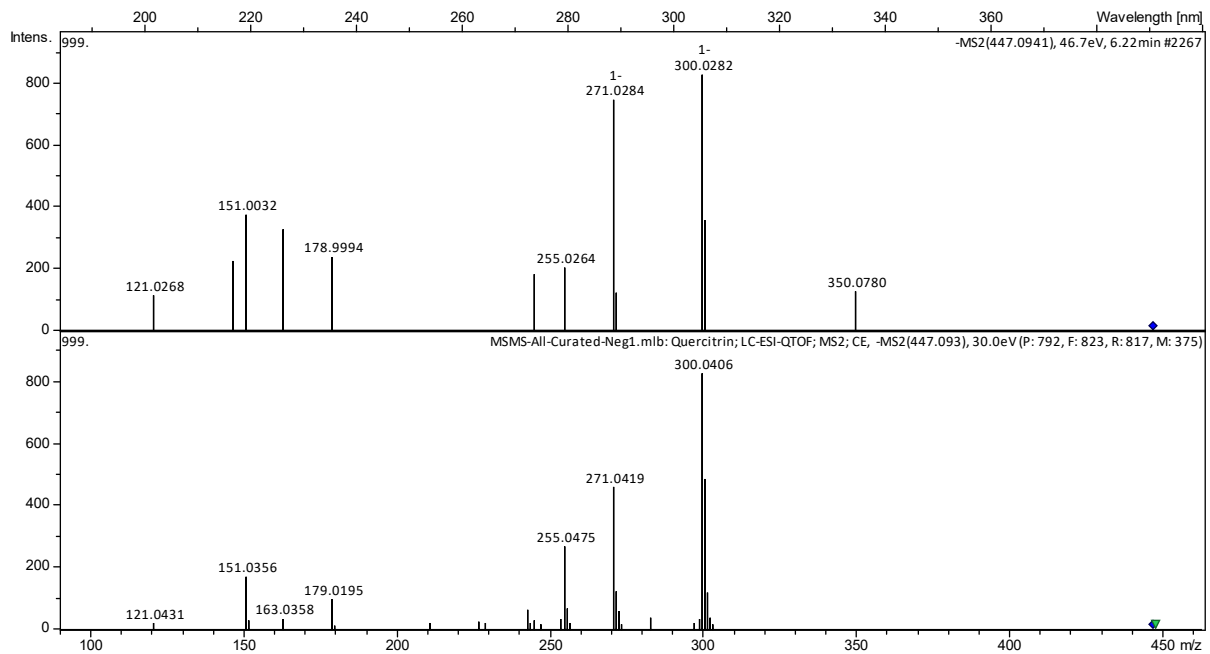

**Supplementary Figure 3.** Head-to-tail spectral comparisons between the experimental MS/MS spectra and the referenced library MS/MS spectra. (A) Peak 1: Isoquercitrin, m/z of 463.0888, retention time (rt) at 5.21 min; (B) Peak 2; (C) Peak 3: Eriodictyol-7-O-glucoside, m/z of 449.1102, rt at 6.15 min; (D) Peak 4: Quercitrin, m/z of 477.0941, rt at 6.26 min; (E) Peak 5: Azelaic acid, m/z of 187.0977, rt at 6.58 min; (F) Peak 6: Glansreginin A, m/z of 592.2043, rt at 7.18 min.
